# Supplementary material for: Evaluation of the Aquatic Toxicity of Several Triazole Fungicides
Source: MDPI journal article supplement (doi:10.3390/metabo14040197), 2024-04-02
Supplement: s1 [file s1]

Supplementary material

## Evaluation of the Aquatic Toxicity of Several Triazole Fungicides

Bianca-Vanesa Boros <sup>1,2,†</sup>, Diana-Larisa Roman <sup>1,2,†</sup> and Adriana Isvoran <sup>1,2,\*,†</sup>

<sup>1</sup> Department of Biology-Chemistry, Faculty of Chemistry, Biology, Geography, West University of Timisoara, 16 Pestalozzi, 300115 Timisoara, Romania; bianca.boros@e-uvt.ro (B.-V.B.); diana.roman@e-uvt.ro (D.-L.R.)

<sup>2</sup> Advanced Environmental Research Laboratories (AERL), 4 Oituz, 300086 Timisoara, Romania

\* Correspondence: adriana.isvoran@e-uvt.ro

† These authors contributed equally to this work.

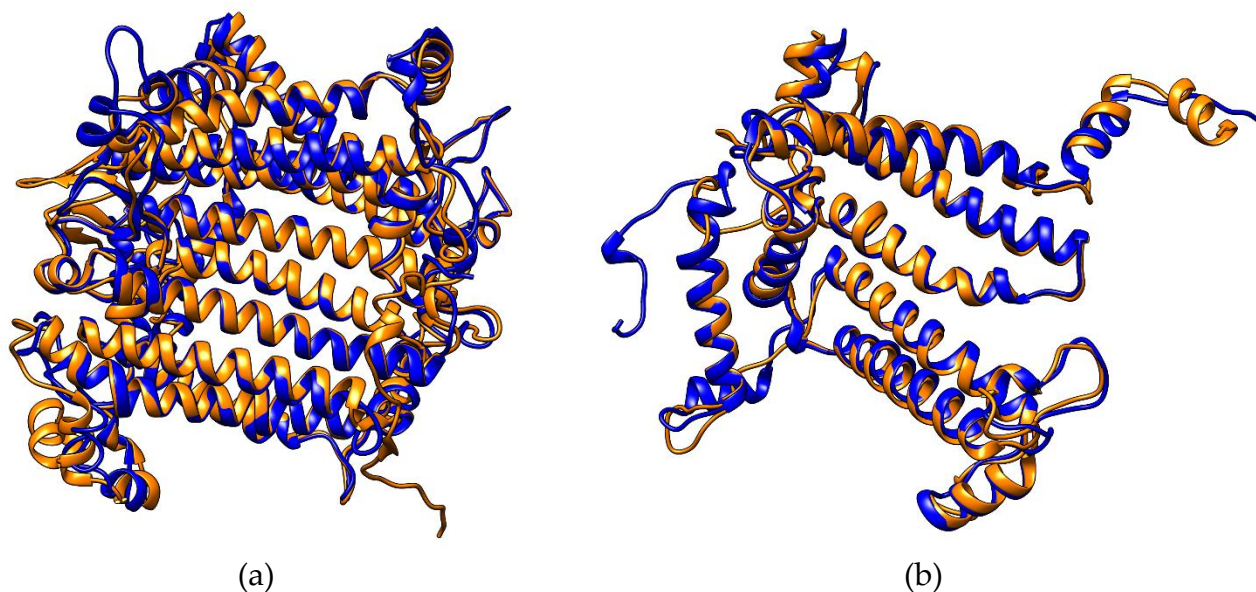

**Figure S1.** Superposition of: (a) structures of photosystem I P700 chlorophyll a apoproteins A1 (orange ribbon) and A2 (blue ribbon); (b) photosystem II reaction center proteins D1 (orange ribbon) and D2 (Blue ribbon).

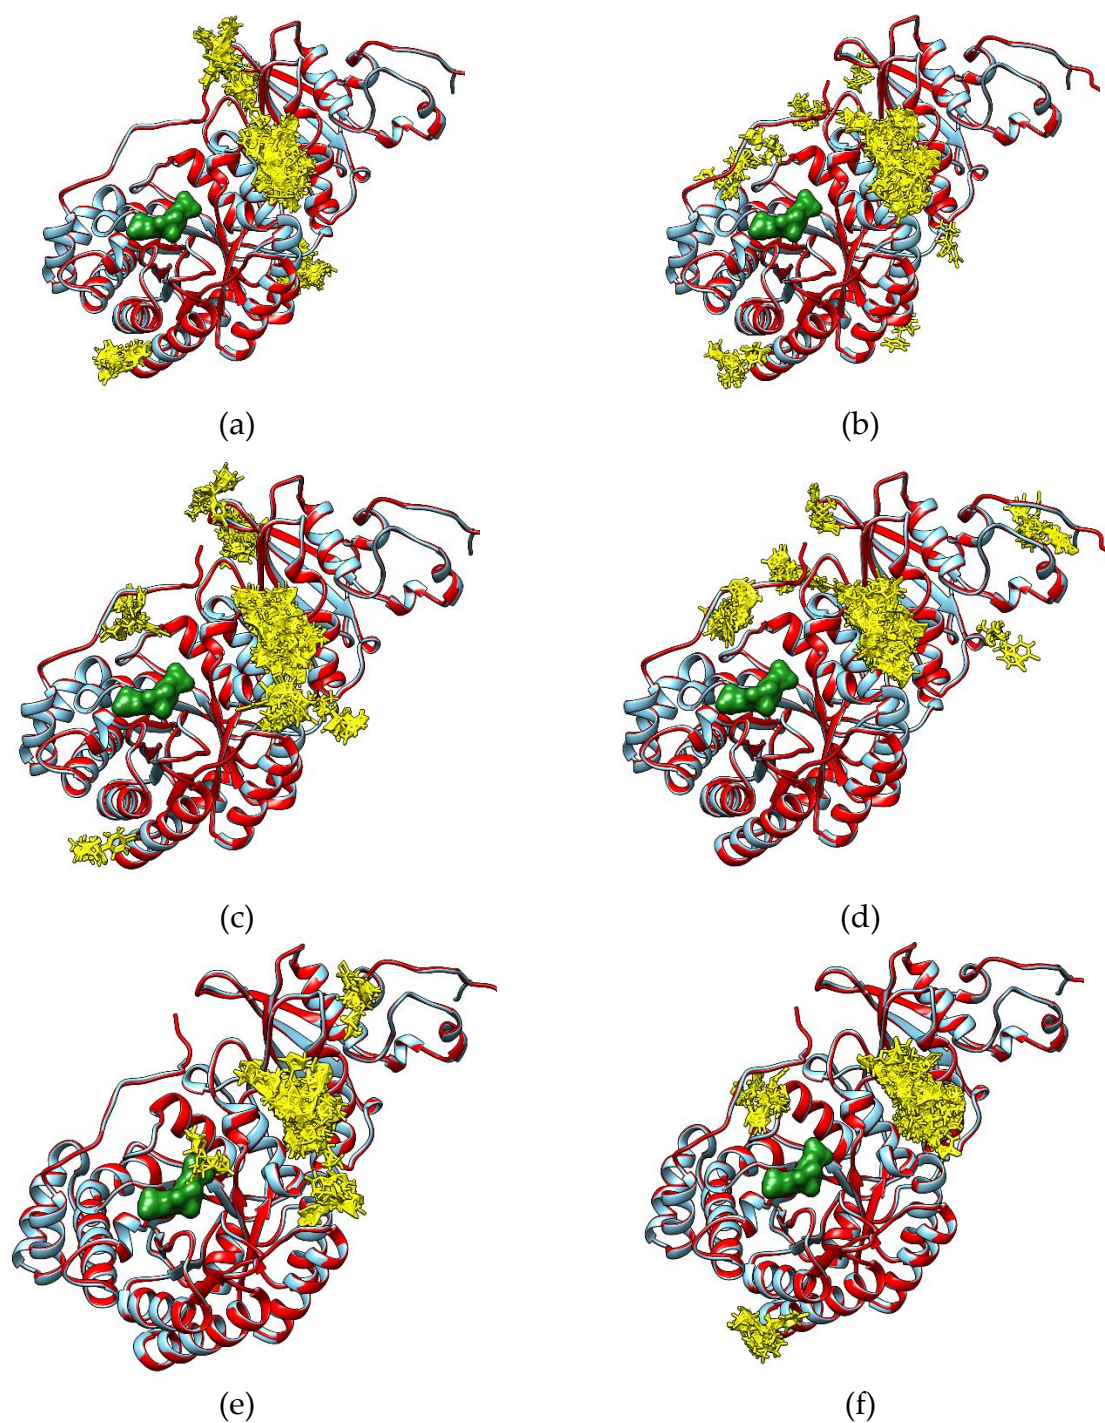

**Figure S2.** Binding modes of flutriafol (a), metconazole (b), myclobutanil (c), tebuconazole (d), tetraconazole (e) and triticonazole (f) to ribulose biphosphate carboxylase large chain of *Lemna minor* (red ribbon). To identify the active site of the enzyme, it was superposed to the structure of ribulose biphosphate carboxylase large chain from *Spinacia oleracea* (blue ribbon) in complex with ribulose-1,5-diphosphate (green surface). Binding modes of fungicides are revealed as yellow sticks.



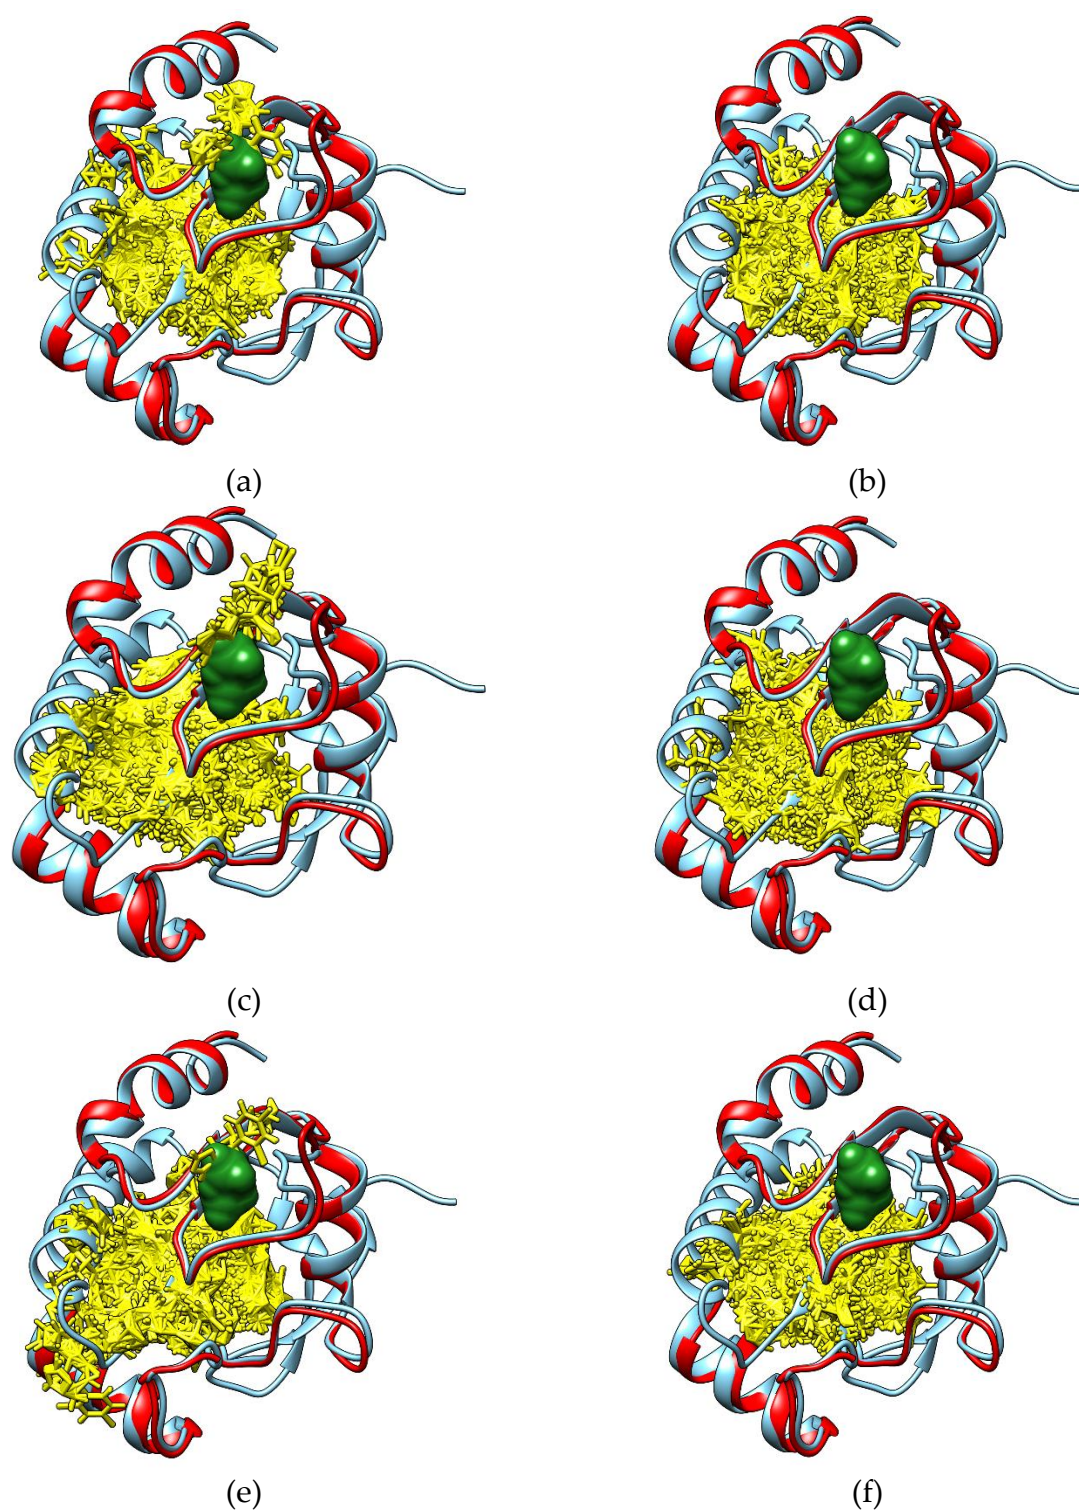

**Figure S3.** Binding modes of flutriafol (a), metconazole (b), myclobutanil (c), tebuconazole (d), tetraconazole (e) and triticonazole (f) to glutathione peroxidase of *Lemna minor* (red ribbon). To identify the active site of the enzyme, it was superposed to the structure of glutathione peroxidase from *Schistosoma mansoni* (blue ribbon) in complex with pyrophosphate (green surface). Binding modes of fungicides are revealed as yellow sticks.

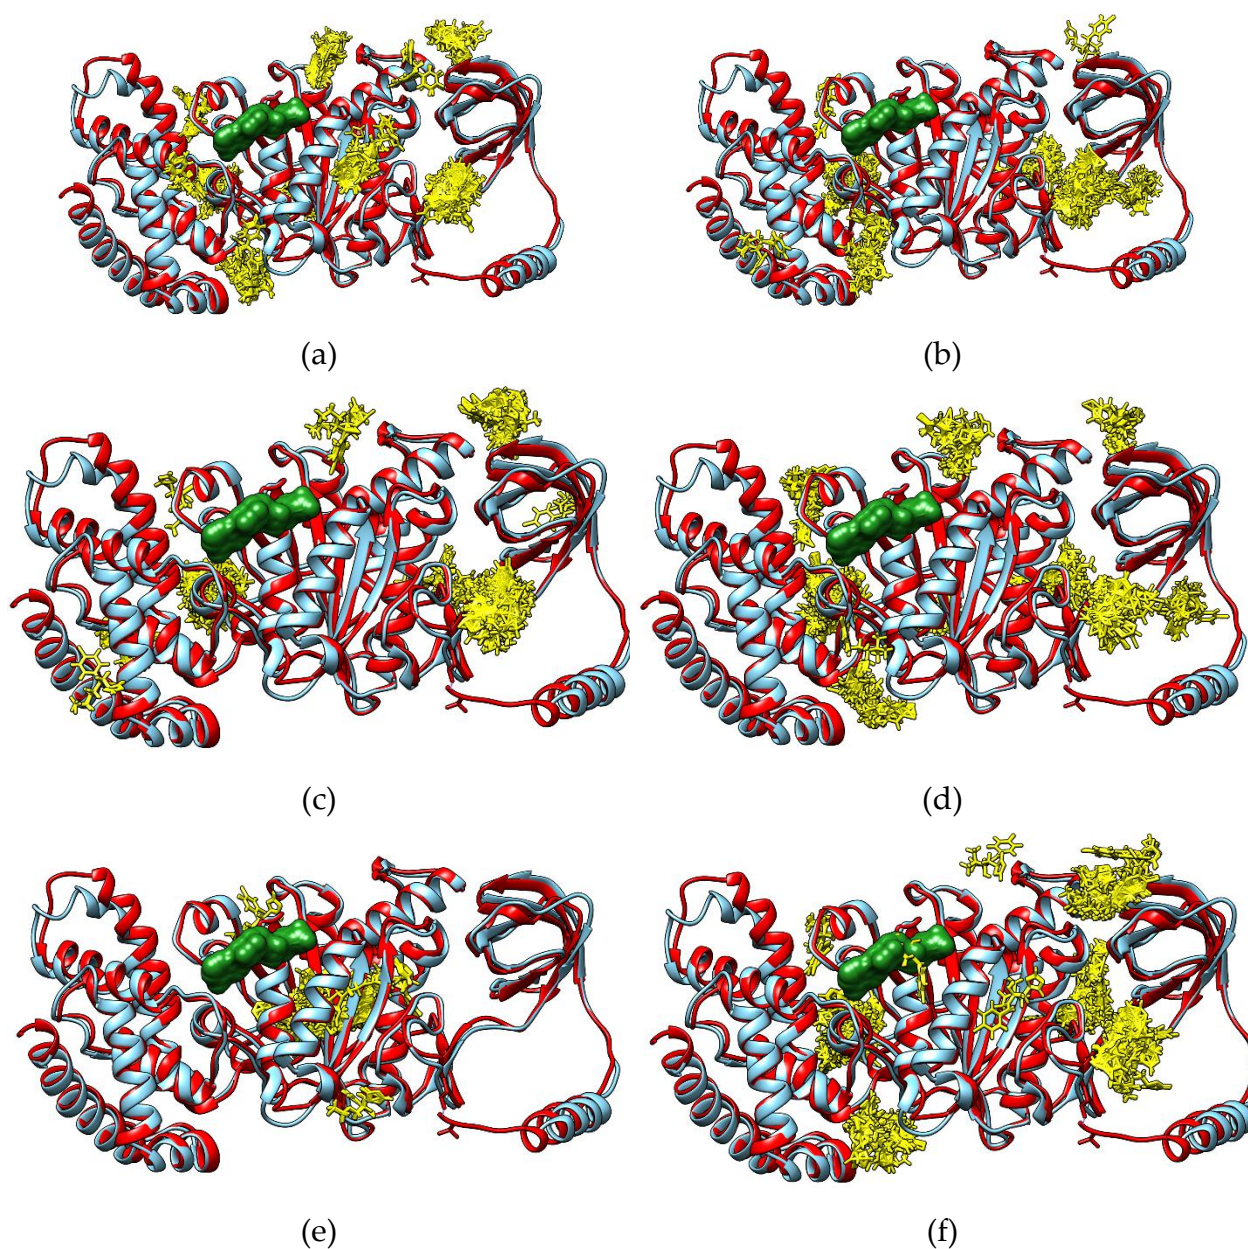

**Figure S4.** Binding modes of flutriafol (a), metconazole (b), myclobutanil (c), tebuconazole (d), tetraconazole (e) and triticonazole (f) to chloroplast ATP synthase subunit alpha of *Lemna minor* (red ribbon). To identify the active site of the enzyme, it was superposed to the structure of chloroplast ATP synthase subunit alpha from *Spinacia oleracea* (blue ribbon) in complex with ATP (green surface). Binding modes of fungicides are revealed as yellow sticks.



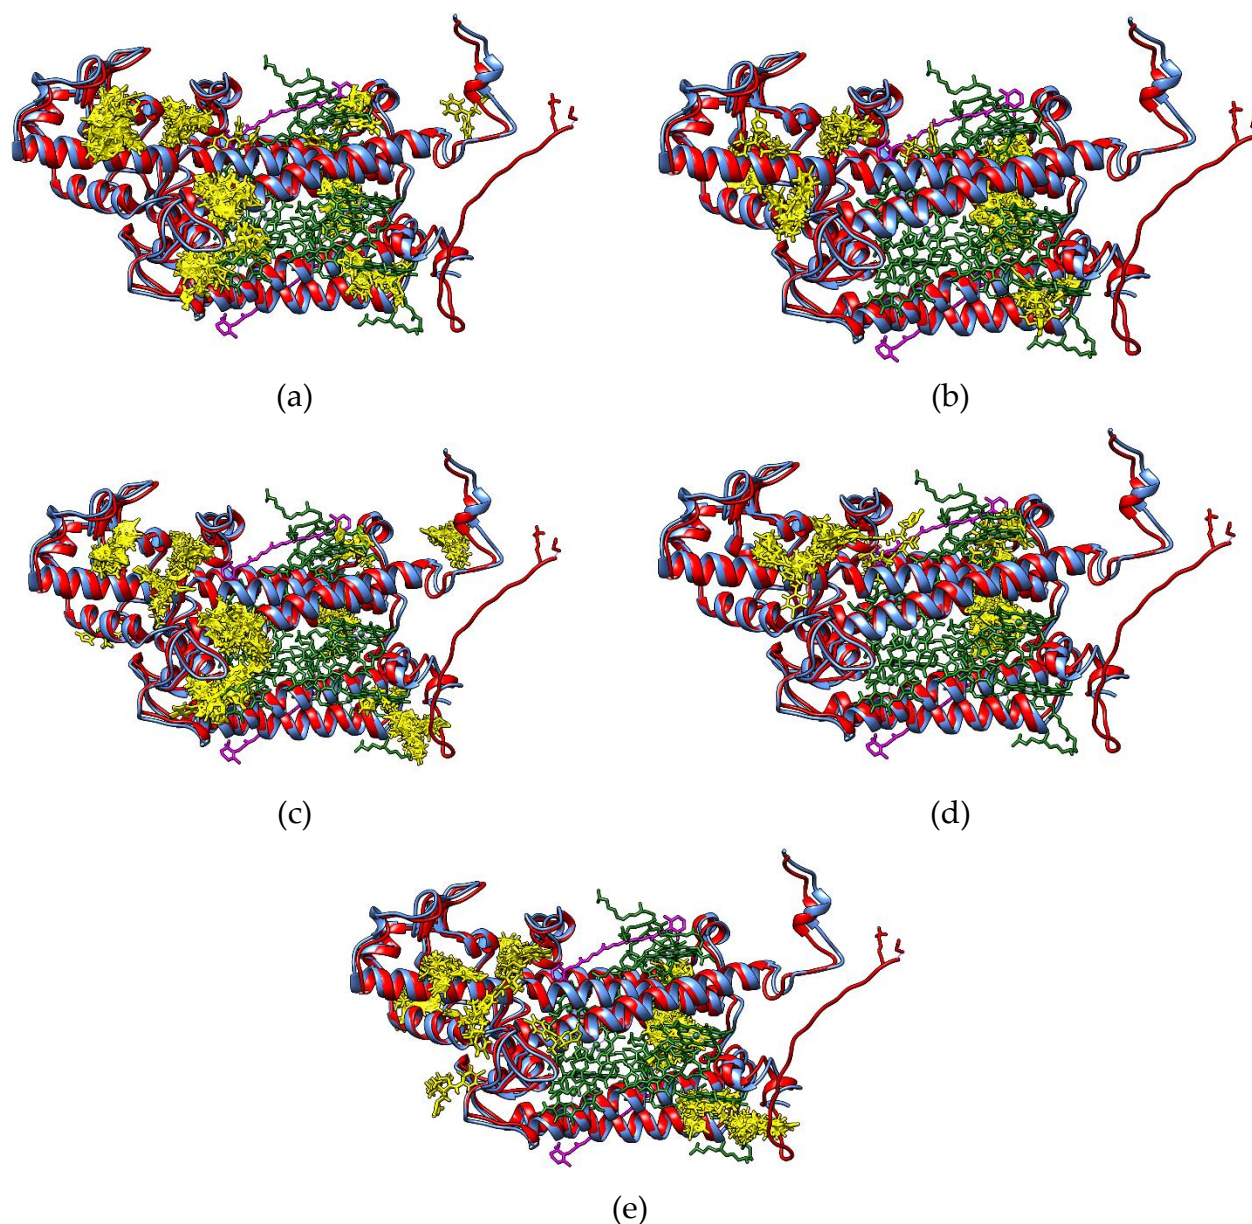

**Figure S5.** Binding modes of flutriafol (a), metconazole (b), myclobutanil (c), tebuconazole (d), and triticonazole (e) to photosystem II CP43 reaction center protein of *Lemna minor* (red ribbon). To identify the active site of the enzyme, it was superposed to the structure of photosystem II CP43 reaction center protein from *Pisum sativum* (blue ribbon) bound in the photosystem II and containing chlorophyll a (green sticks) and beta-carotene (magenta sticks) molecules. Binding modes of fungicides are revealed as yellow sticks.

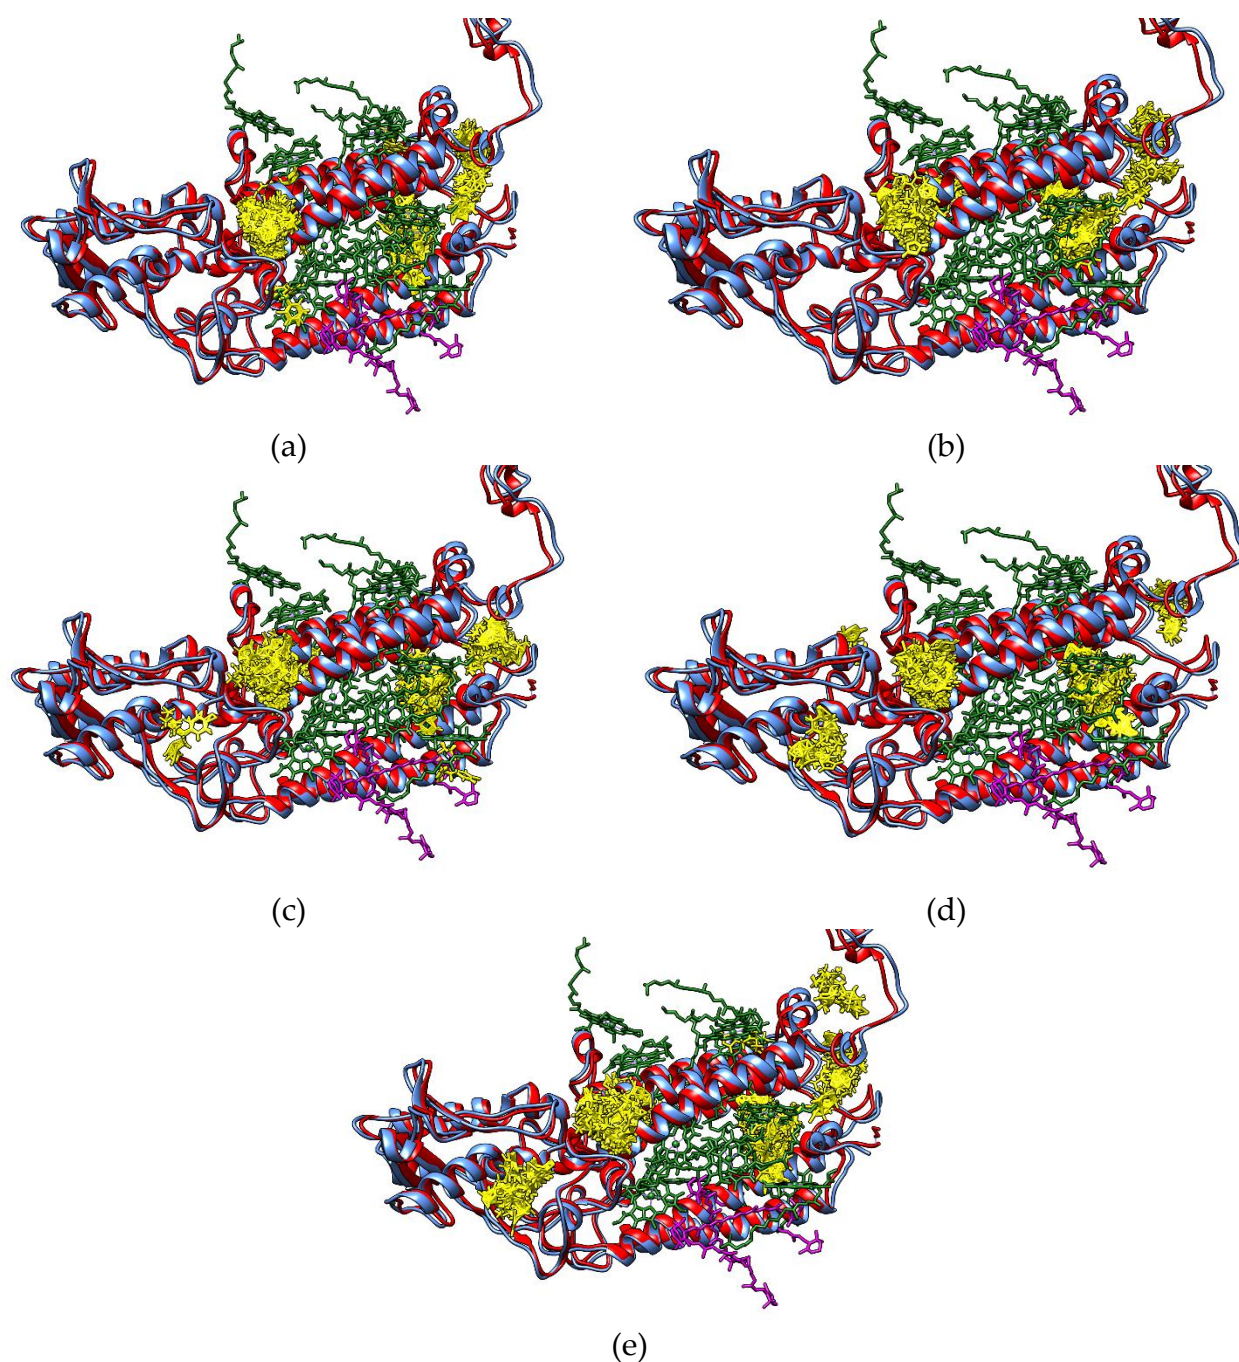

**Figure S6.** Binding modes of flutriafol (a), metconazole (b), myclobutanil (c), tebuconazole (d), and triticonazole (e) to photosystem II CP47 reaction center protein of *Lemna minor* (red ribbon). To identify the active site of the enzyme, it was superposed to the structure of photosystem II CP47 reaction center protein from *Pisum sativum* (blue ribbon) bound in the photosystem II and containing chlorophyll a (green sticks) and beta-carotene (magenta sticks) molecules. Binding modes of fungicides are revealed as yellow sticks.



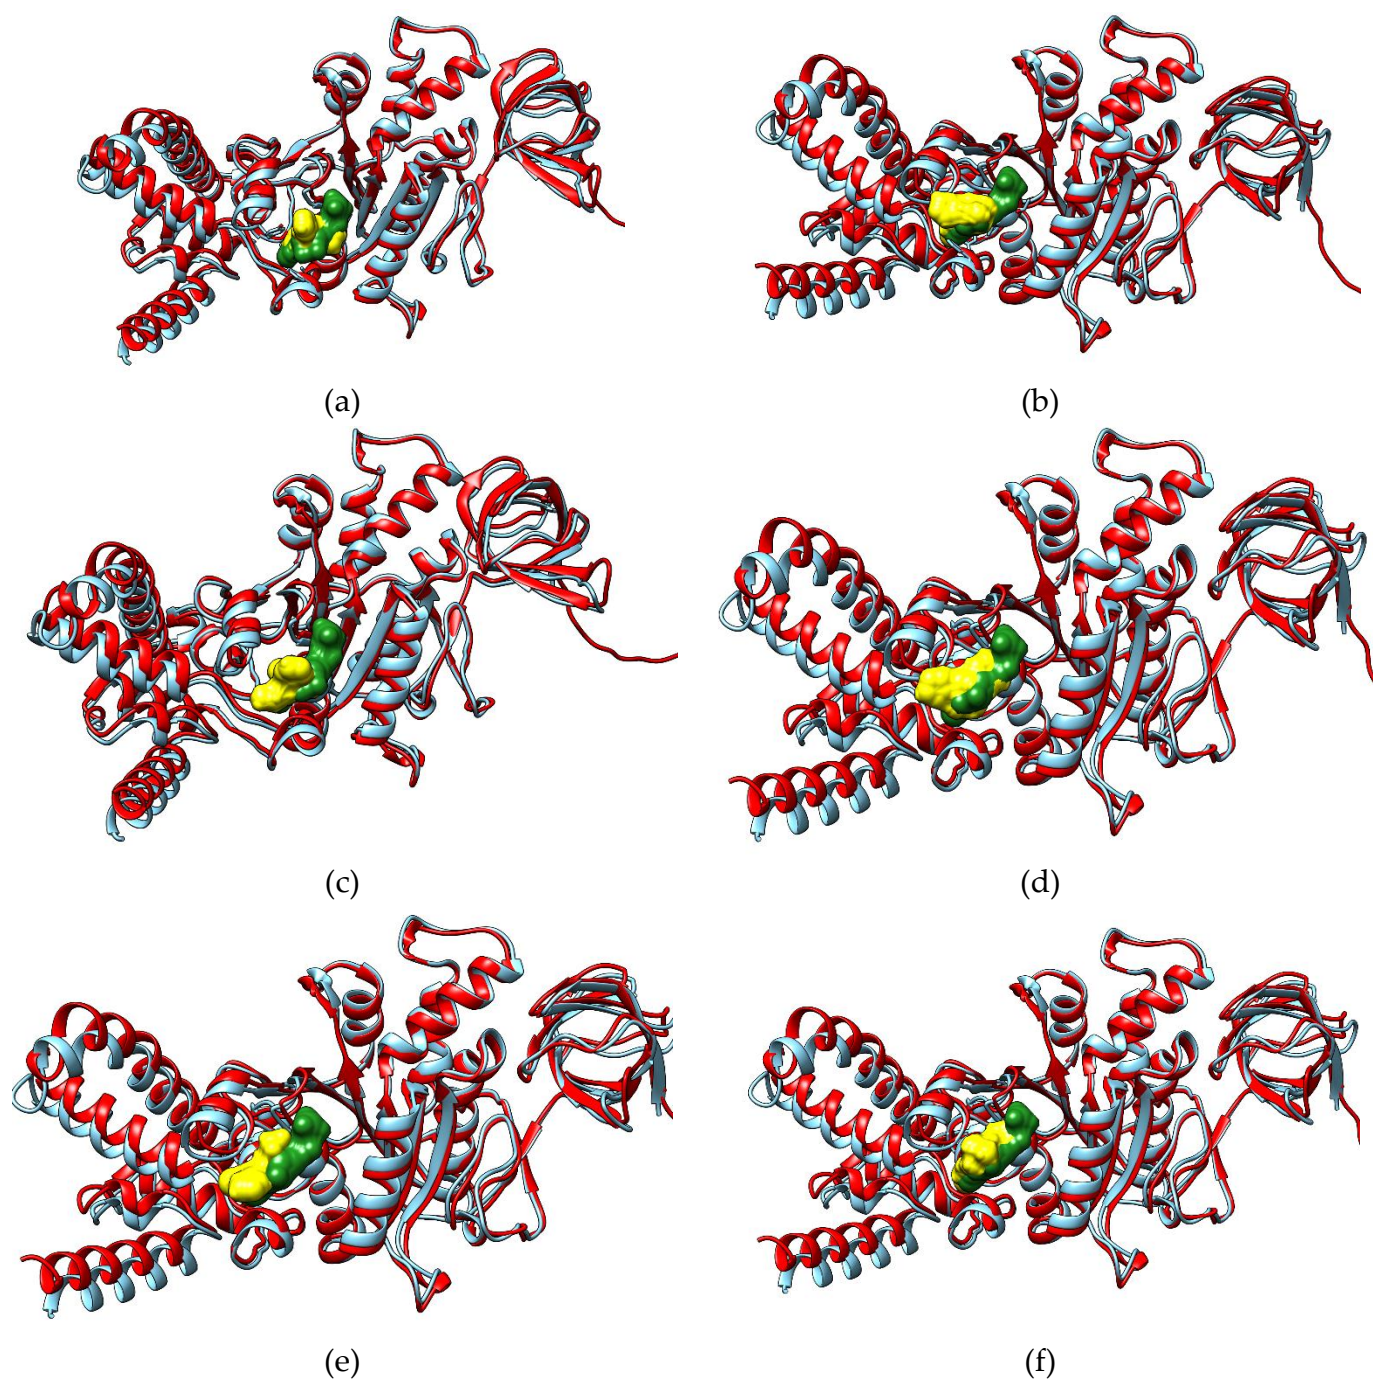

**Figure S7.** Binding modes of flutriafol (a), metconazole (b), myclobutanil (c), tebuconazole (d), tetraconazole (e) and triticonazole (f) to chloroplast ATP synthase subunit beta of *Lemna minor* (red ribbon). To identify the active site of the enzyme, it was superposed to the structure of chloroplast ATP synthase subunit beta from *Spinacia oleracea* (blue ribbon) in complex with ADP (green surface). Binding modes of fungicides are revealed as yellow surface.

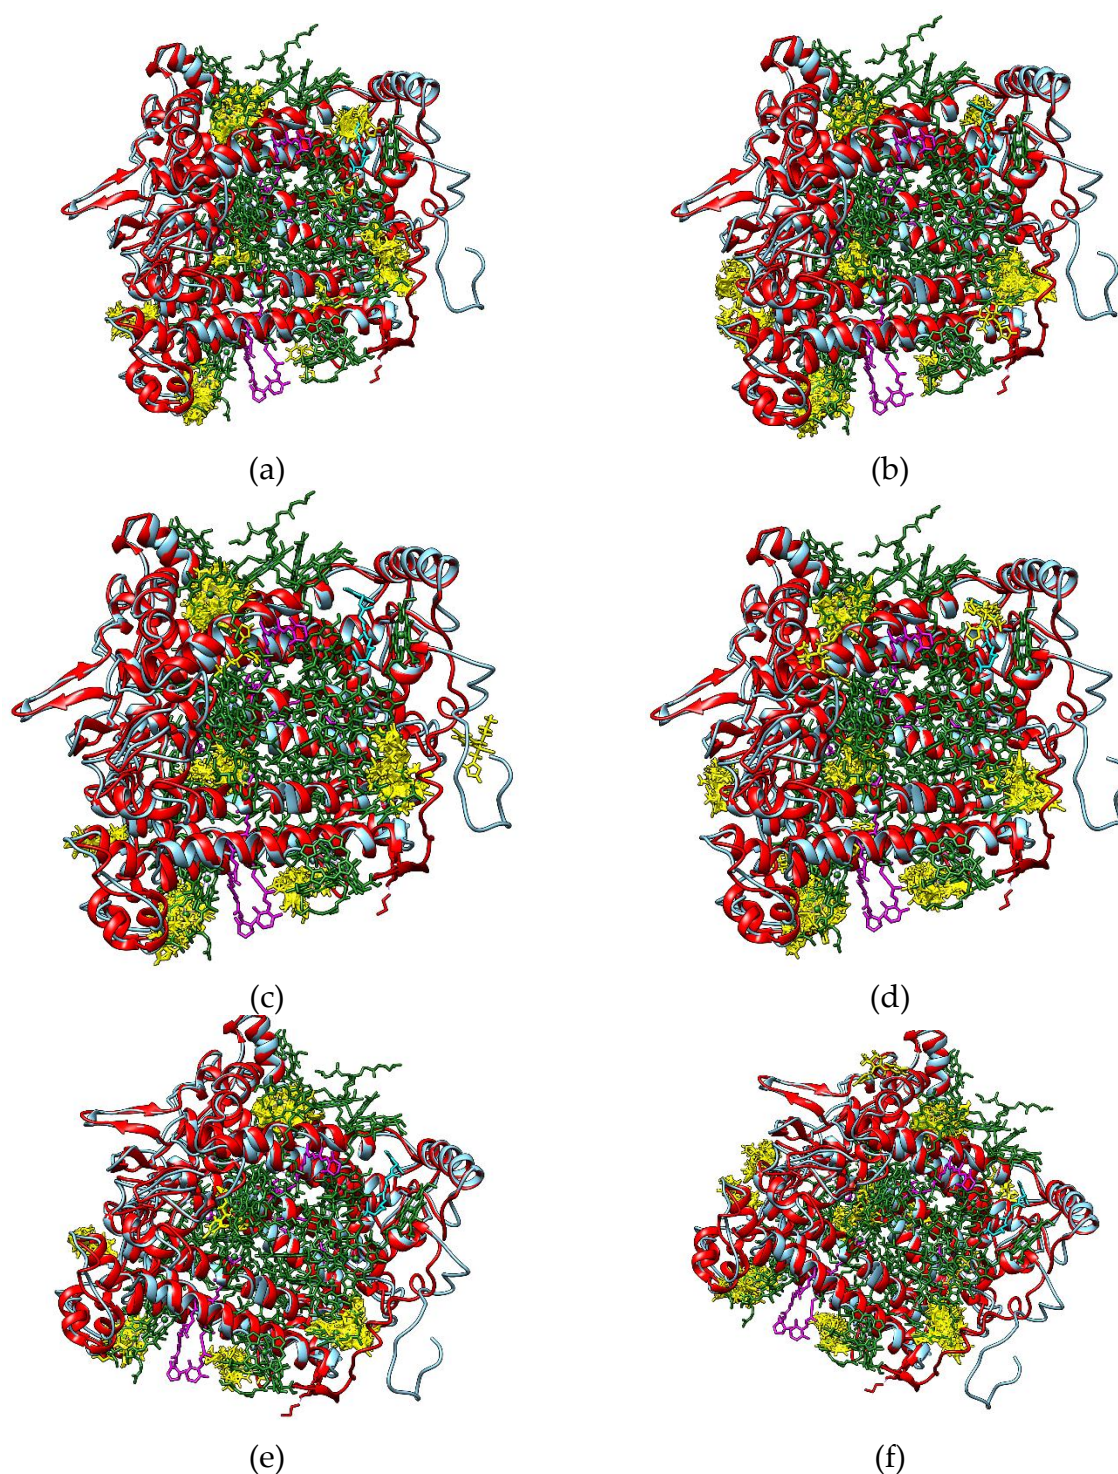

**Figure S8.** Binding modes of flutriafol (a), metconazole (b), myclobutanil (c), tebuconazole (d), tetraconazole (e) and triticonazole (f) to photosystem I P700 chlorophyll a apoprotein A1 of *Lemna minor* (red ribbon). To identify the active site of the enzyme, it was superposed to the structure of photosystem I P700 chlorophyll a apoprotein A1 from *Pisum sativum* (blue ribbon) bound in the photosystem I complex and containing chlorophyll a (green sticks), beta-carotene (magenta sticks) and phyloquinone (cyan sticks) molecules. Binding modes of fungicides are revealed as yellow sticks.



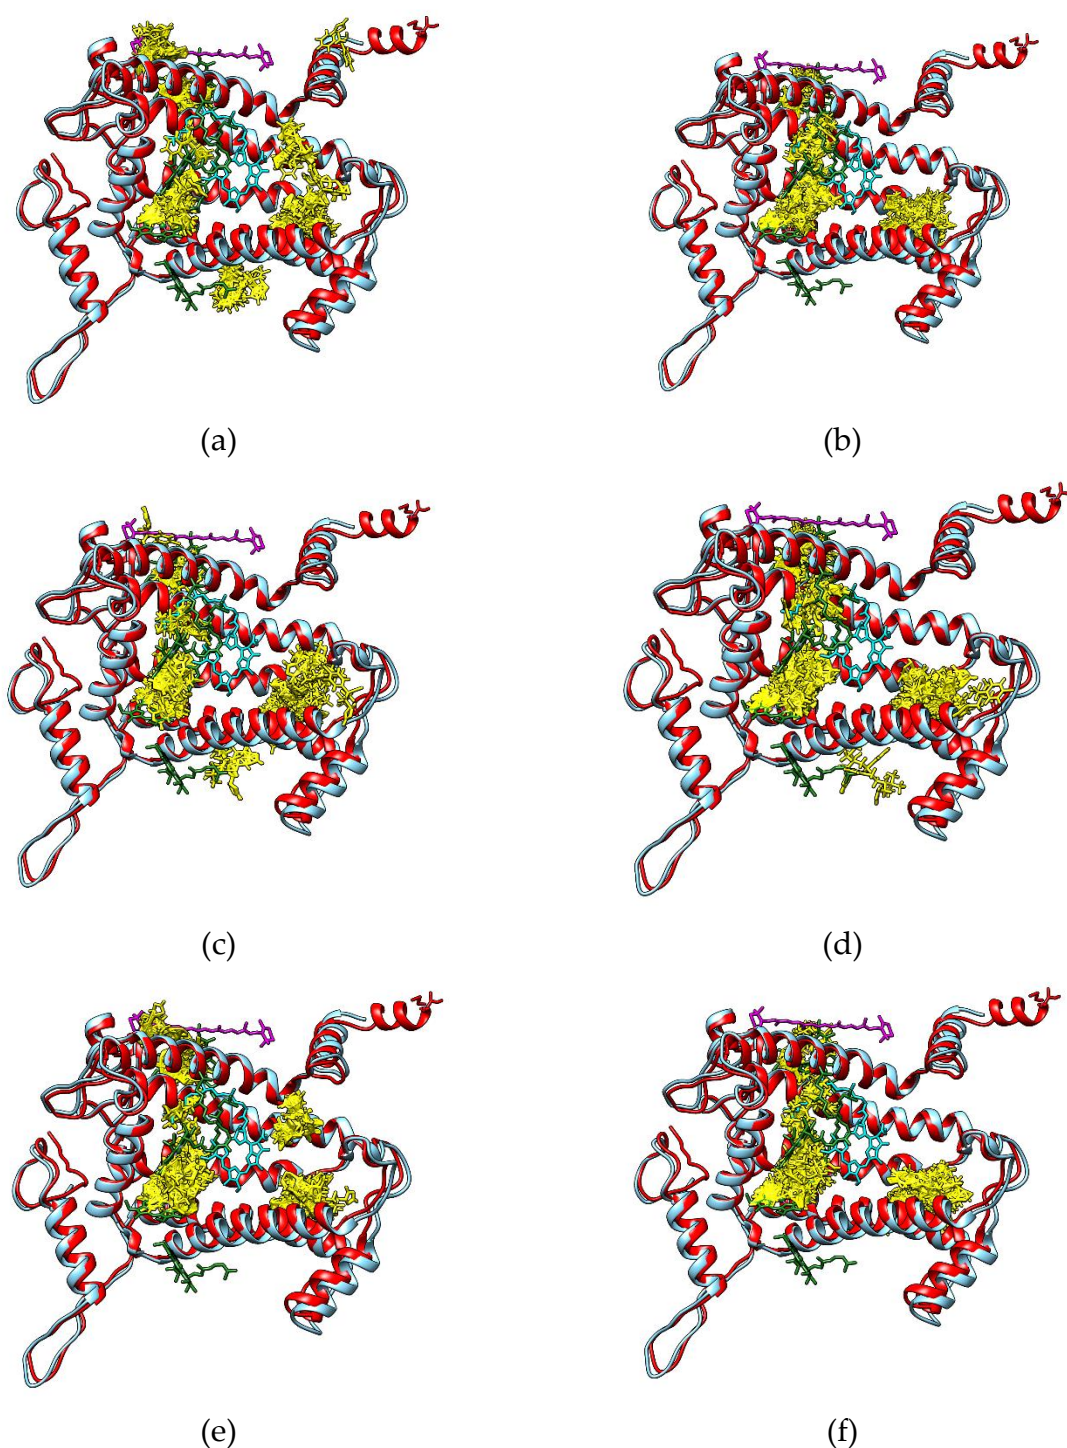

**Figure S9.** Binding modes of flutriafol (a), metconazole (b), myclobutanil (c), tebuconazole (d), tetraconazole (e) and triticonazole (f) to photosystem II protein D1 of *Lemna minor* (red ribbon). To identify the active site of the enzyme, it was superposed to the structure of photosystem II protein D1 from *Pisum sativum* (blue ribbon) bound in the photosystem I complex and containing chlorophyll a (green sticks), beta-carotene (magenta sticks), and pheophytin a (cyan sticks). Binding modes of fungicides are revealed as yellow sticks.
